# Supplementary material for: Transparency of Results Reporting in Cancer Clinical Trials
Source: PubMed Central journal article supplement (PMC10413165; doi:10.1001/jamanetworkopen.2023.28117), 2023-08-09
Supplement: jamanetwopen-e2328117-s001.pdf [file jamanetwopen-e2328117-s001.pdf]

## Data Sharing Statement

Kao. Transparency of Results Reporting in Cancer Clinical Trials. *JAMA Netw Open*.  
Published online August 9, 2023. doi:10.1001/jamanetworkopen.2023.28117

### Data

**Data available:** Yes

**Data types:** Data (not involving human participants)

**How to access data:** The clinical trial and publication data that support the findings of this study will be made publicly available at <https://github.com/JenKao/TrialTransparency> . Clinical outcomes data comes from American Society of Clinical Oncology (ASCO) conference abstracts. This data can be purchased from the ASCO Data Library (<https://old-prod.asco.org/research-data/asco-data-library>).

**When available:** With publication

### Supporting Documents

**Document types:** None

### Additional Information

**Who can access the data:** public

**Types of analyses:** any purpose

**Mechanisms of data availability:** public repository

**Any additional restrictions:** none
